# Supplementary material for: Facile synthesis of Co(ii)-doped cobalt oxide nanostructures: their application in the sensitive determination of the prophylactic drug furazolidone
Source: Royal Society of Chemistry journal article supplement (doi:10.1039/d1nj01261d), 2021-01-01
Supplement: d1nj01261d1.pdf [file d1nj01261d1.pdf]

**Supporting information**

**A facile synthesis of Co (II) doped cobalt oxide nanostructures; Application for the sensitive determination of prophylactic drug furazolidone**

Alagumalai Krishnapandi,<sup>a</sup> Shanmugam Ragurethinam,<sup>a</sup> Shen-Ming Chen,<sup>a\*</sup> Balamurugan Muthukutty,<sup>a</sup>

<sup>a</sup>Electroanalysis and Bioelectrochemistry Lab, Department of Chemical Engineering and Biotechnology, National Taipei University of Technology, No. 1, Section 3, Chung-Hsiao East Road, Taipei 106, Taiwan, ROC.

**\*Corresponding author:**

Prof. Shen-Ming Chen (S.M. Chen)

Tel: (886)-2-27017147; Fax: (886)-2-27025238

E-mail: [smchen78@ms15.hinet.net](mailto:smchen78@ms15.hinet.net)

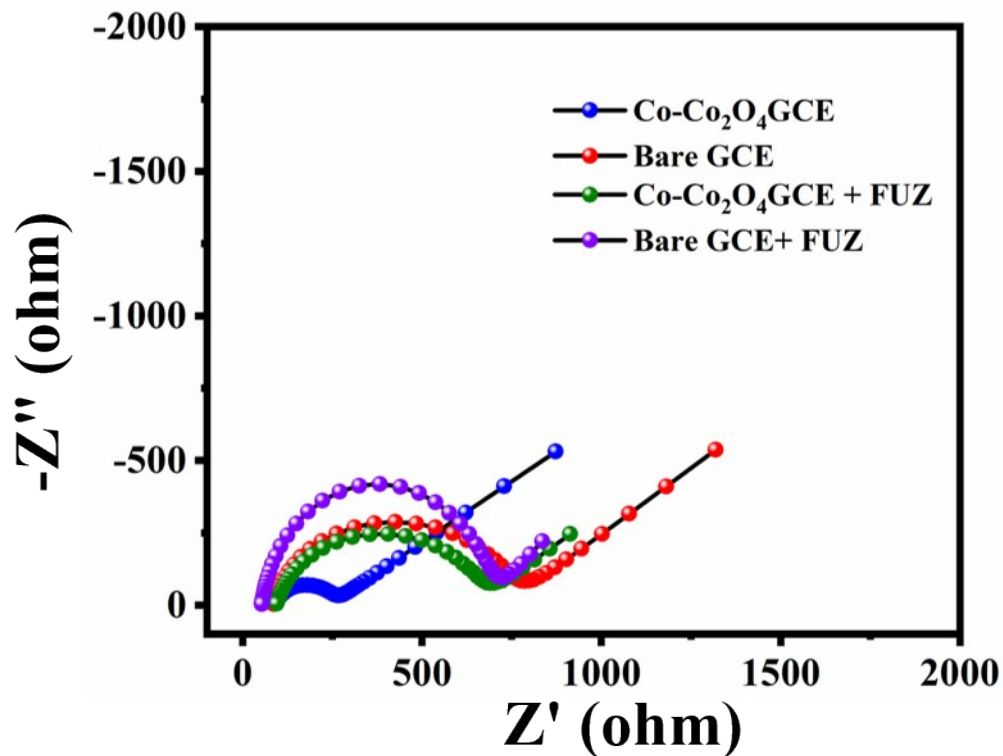

**Fig. S1.** EIS curves for bare gce and Co-Co<sub>2</sub>O<sub>4</sub>/GCE with and without the presence of 10  $\mu$ M FUZ.

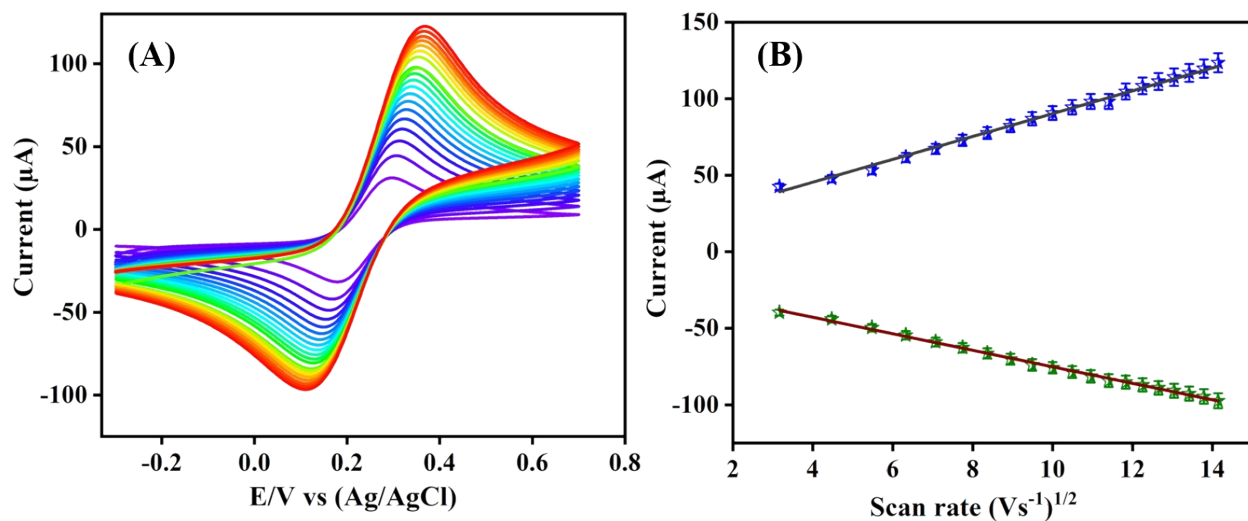

**Fig. S2.** (A) CV plot for different scan rates (20-240  $mVs^{-1}$ ) at Co-Co<sub>2</sub>O<sub>4</sub>/GCE in 5 mM of [Fe(CN)<sub>6</sub>]<sup>3-/4-</sup> comprises of 0.1 M of KCl. (B) Corresponding linear calibration plot for the redox couple.

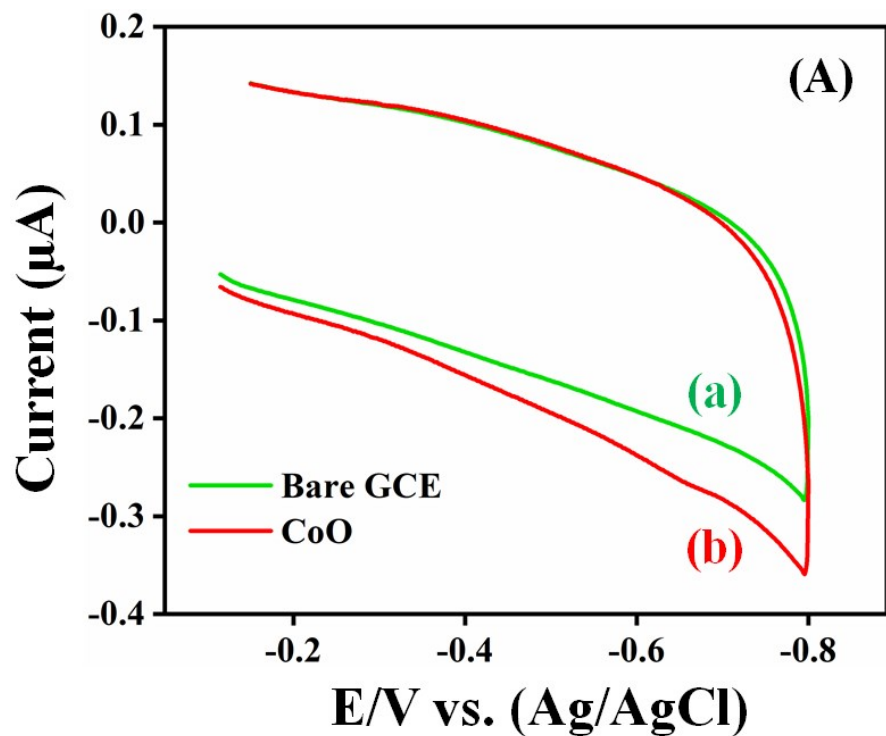

Fig. S3. (A) Current response in the absence of FUZ at bare GCE (a) and Co-Co<sub>2</sub>O<sub>4</sub>/GCE (b).

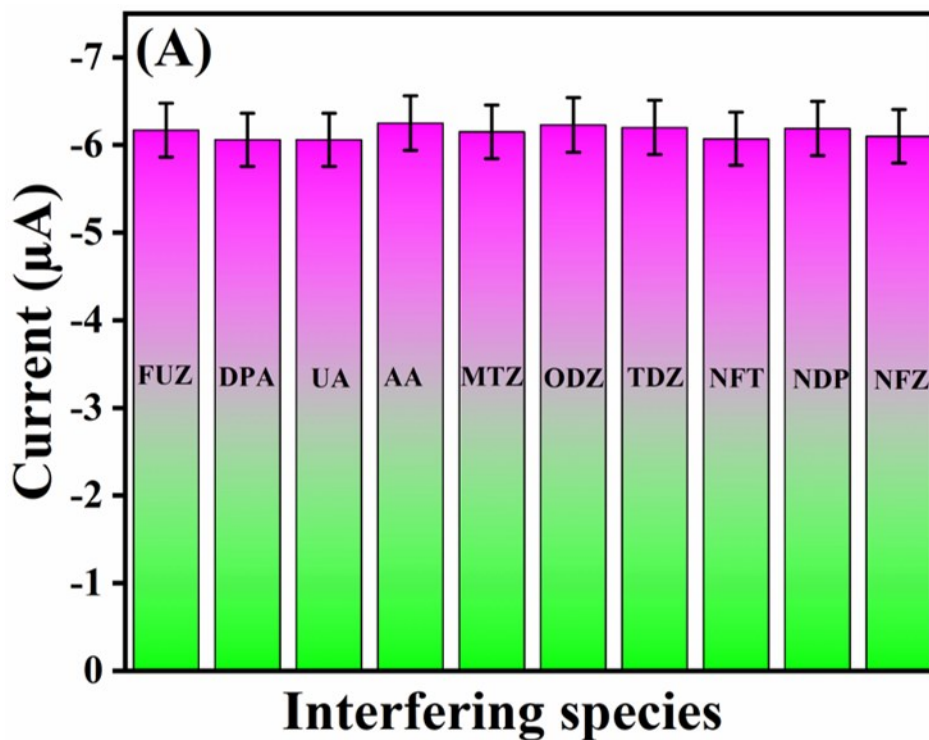

Fig. S4. (A) Error bar graph for interfering species vs. current.
